# Supplementary material
Source: PubMed Central journal article supplement (PMC3465804)
Supplement: humu0032-1008-SD1.pdf [file humu0032-1008-SD1.pdf]

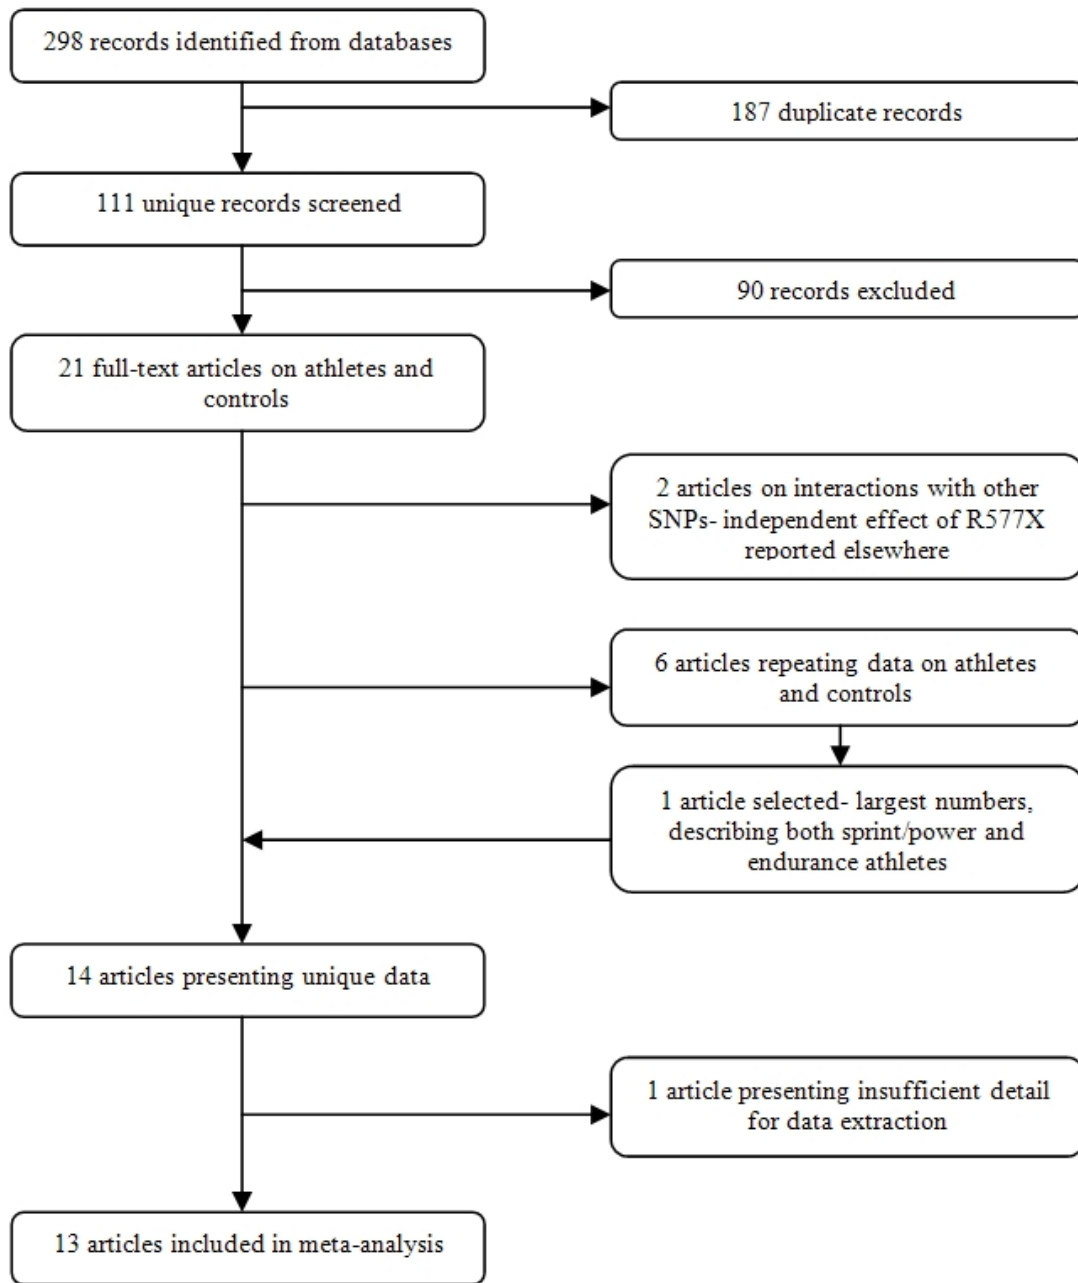

**Supp. Figure S1.** Flow of information for the identification of studies.

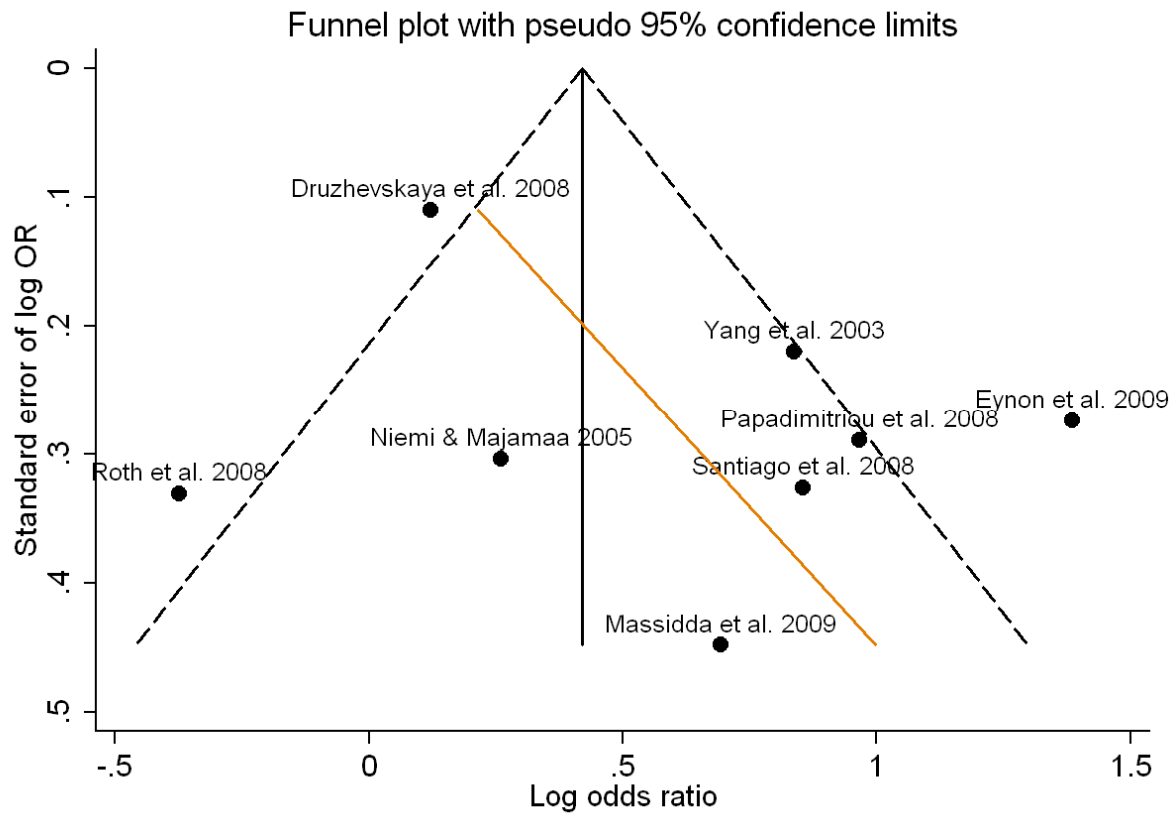

**Supp. Figure S2.** Funnel plot on eight studies for ACTN3 R577X Genotype (RR vs. RX+XX) and Sprint/Power Athletic Status in Europeans. Vertical line represents the overall estimate. Coloured slope represents the fitted regression line for funnel plot asymmetry. Dashed lines represent the pseudo 95% confidence limits. OR: odds ratio.

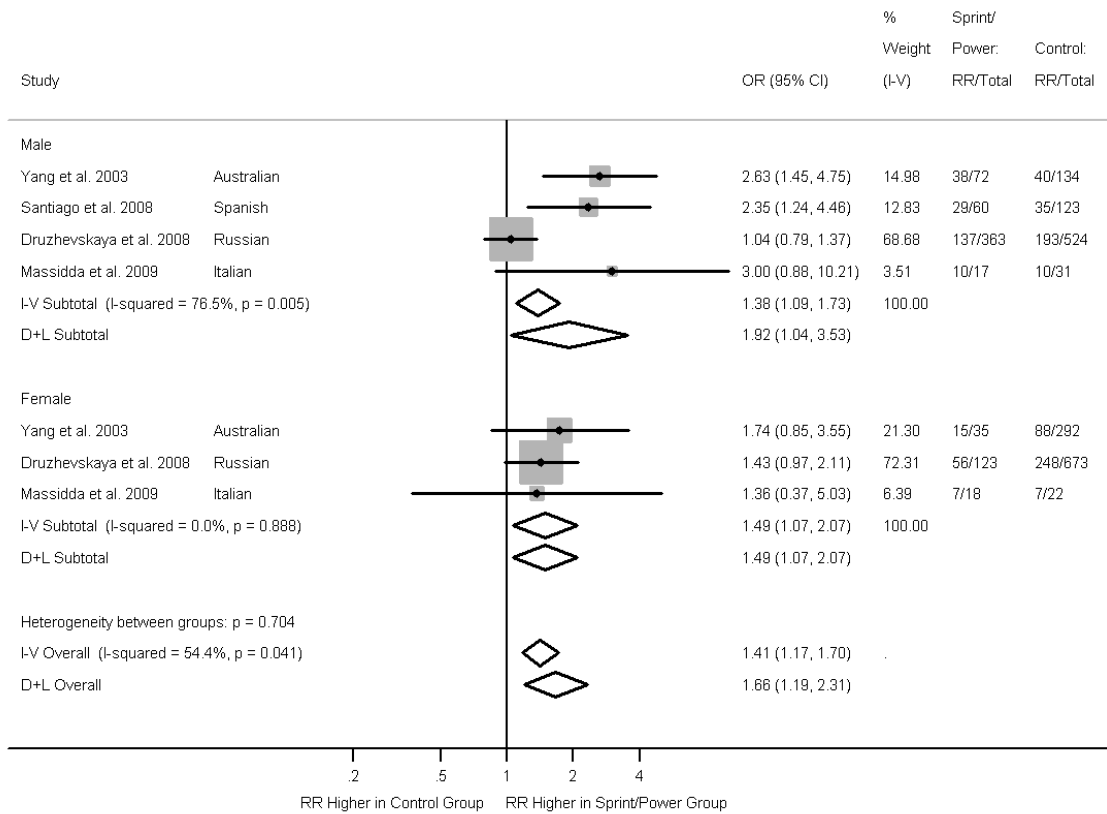

**Supp. Figure S3.** Associations between ACTN3 R577X Genotype (RR vs. RX+XX) and Sprint/Power Athletic Status by Sex from the Literature. Effects are given as odds ratios (OR) and 95% confidence intervals (CI). Analysis limited to studies with data presented by sex. Points and the horizontal lines represent the study effect sizes and their 95% CIs. Sizes of the squares represent the weights of the studies. Diamonds represent the summary effects and their 95% CIs. I-V: Inverse-variance, fixed effect model. D+L: DerSimonian & Laird, random effects model.

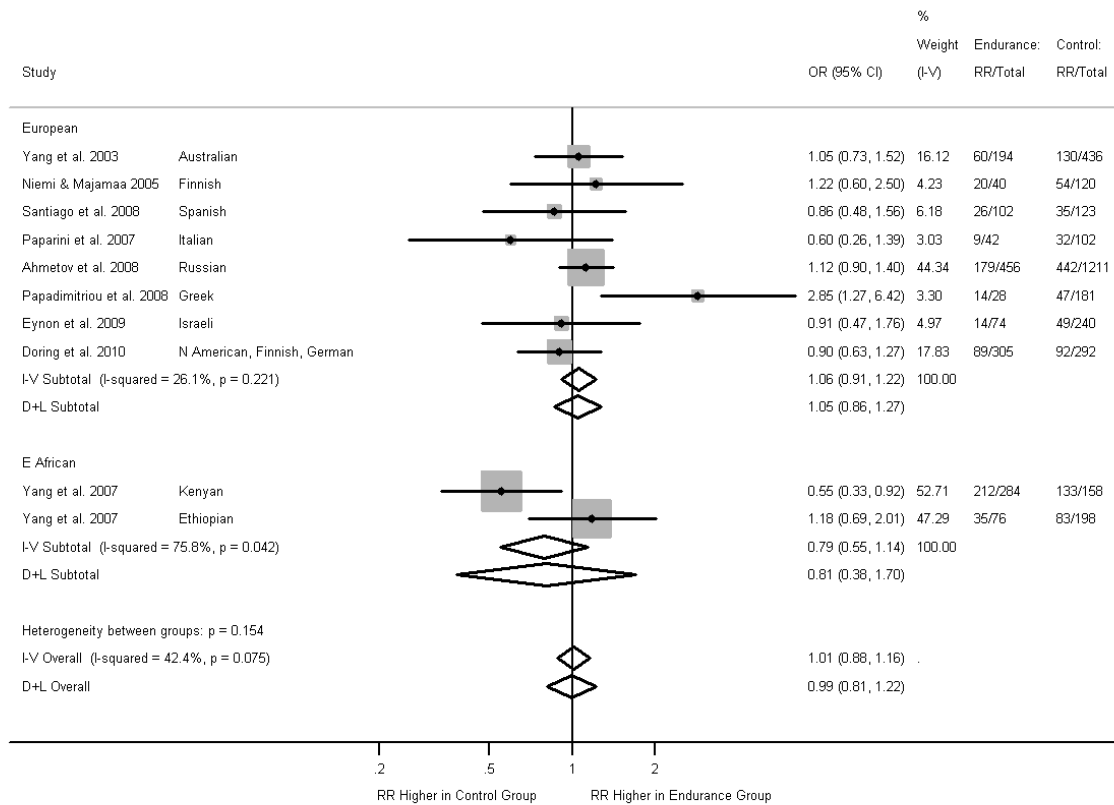

**Supp. Figure S4.** Associations between ACTN3 R577X Genotype (RR vs. RX+XX) and Endurance Athletic Status from the Literature. Arrow indicates the confidence interval extends beyond the plot axis. Stratified by ancestral group. Effects are given as odds ratios (OR) and 95% confidence intervals (CI). Points and the horizontal lines represent the study effect sizes and their 95% CIs. Sizes of the squares represent the weights of the studies. Diamonds represent the summary effects and their 95% CIs. I-V: Inverse-variance, fixed effect model. D+L: DerSimonian & Laird, random effects model.

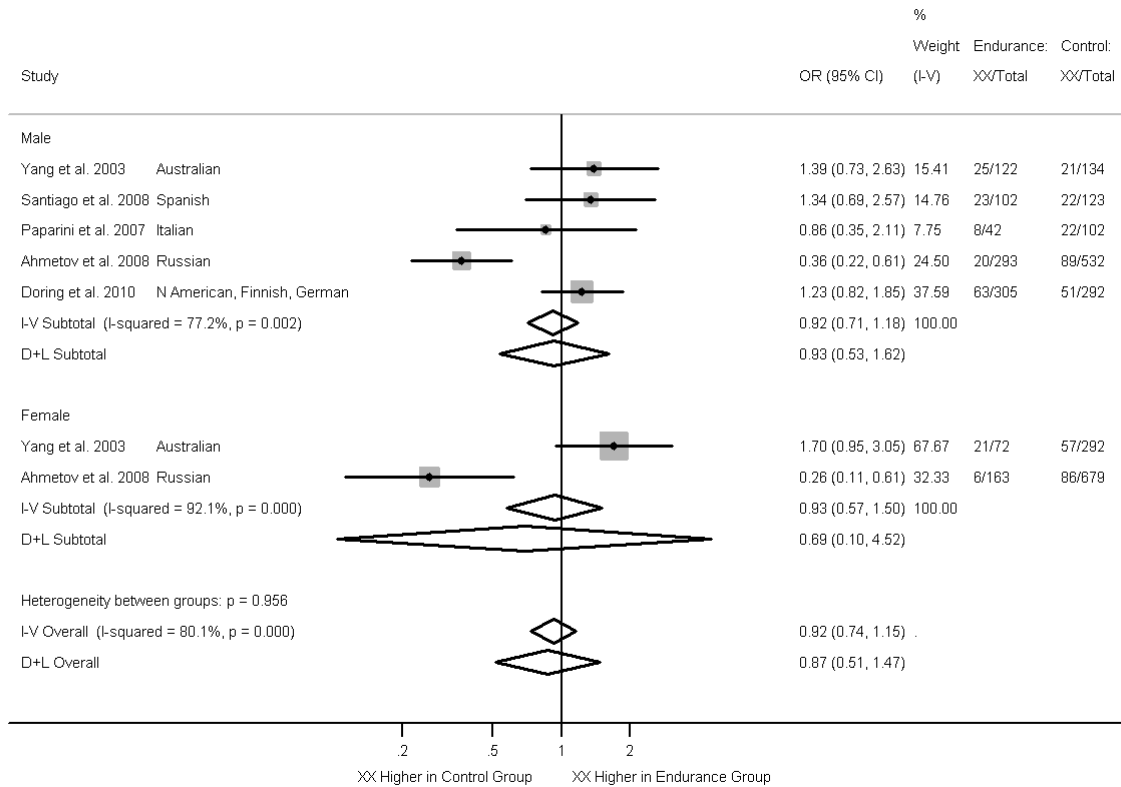

**Supp. Figure S5.** Associations between ACTN3 R577X Genotype (XX vs. RX+RR) and Endurance Athletic Status by Sex from the Literature. Effects are given as odds ratios (OR) and 95% confidence intervals (CI). Analysis limited to studies with data presented by sex. Points and the horizontal lines represent the study effect sizes and their 95% CIs. Sizes of the squares represent the weights of the studies. Diamonds represent the summary effects and their 95% CIs. I-V: Inverse-variance, fixed effect model. D+L: DerSimonian & Laird, random effects model.

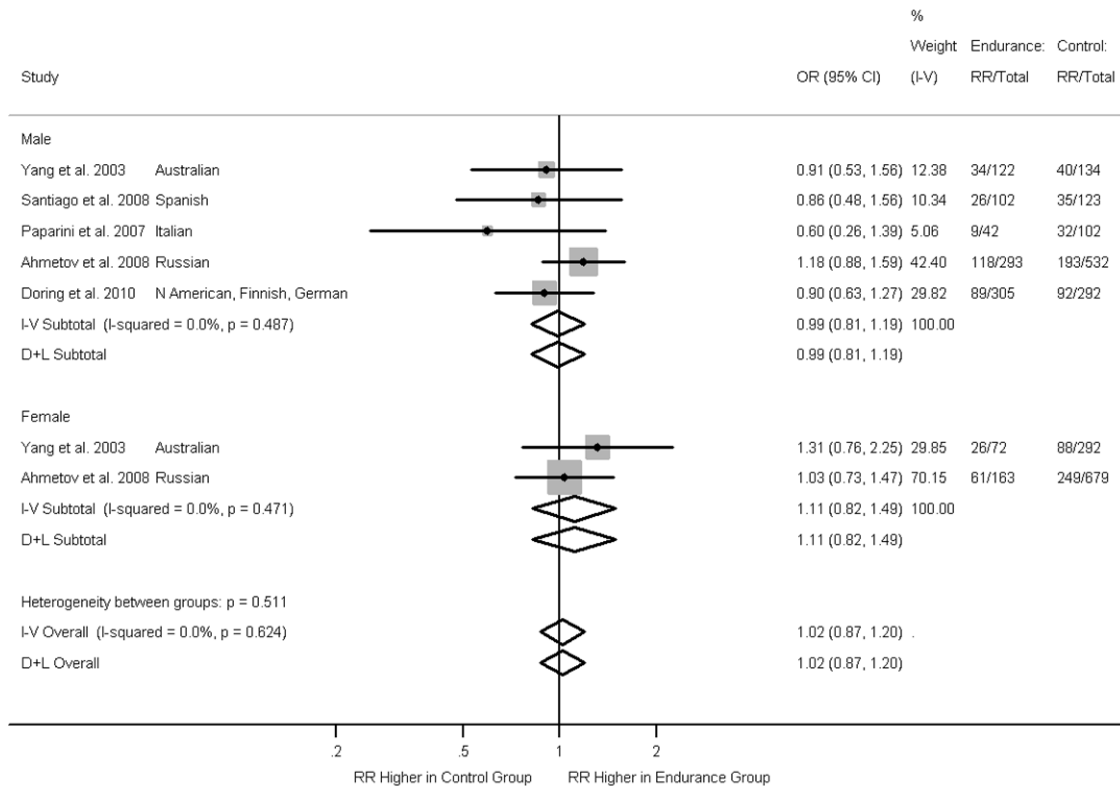

**Supp. Figure S6.** Associations between ACTN3 R577X Genotype (RR vs. RX+XX) and Endurance Athletic Status by Sex from the Literature. Effects are given as odds ratios (OR) and 95% confidence intervals (CI). Analysis limited to studies with data presented by sex. Points and the horizontal lines represent the study effect sizes and their 95% CIs. Sizes of the squares represent the weights of the studies. Diamonds represent the summary effects and their 95% CIs. I-V: Inverse-variance, fixed effect model. D+L: DerSimonian & Laird, random effects model.

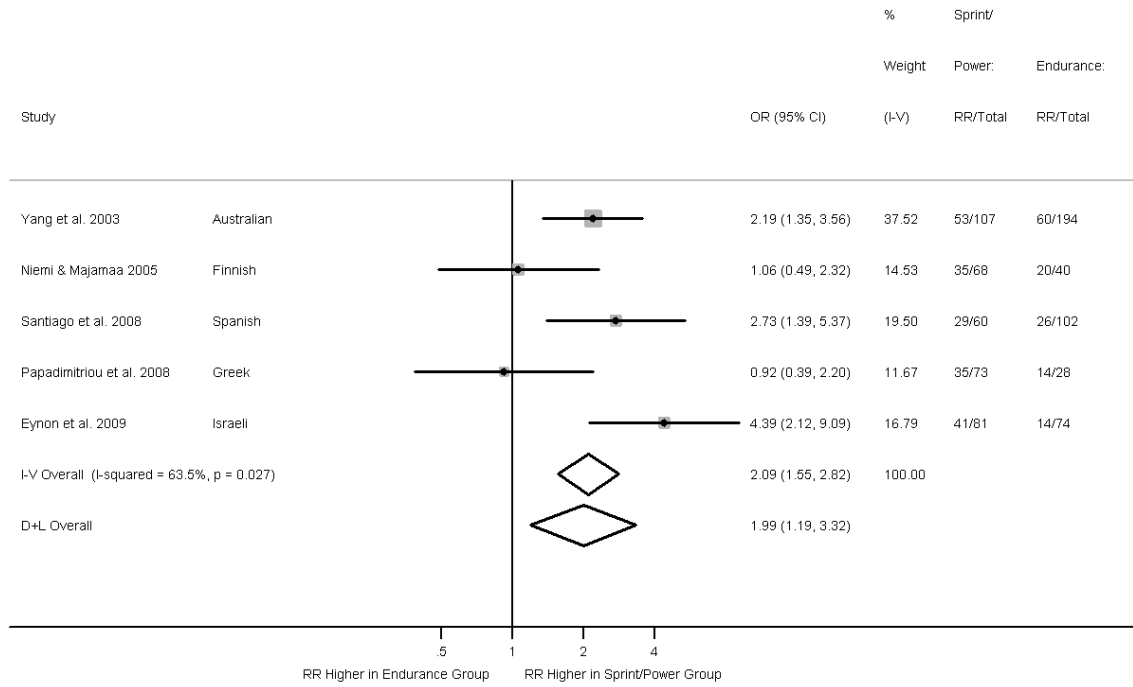

**Supp. Figure S7.** Associations between ACTN3 R577X Genotype (RR vs. RX+XX) and Sprint/Power and Endurance Athletic Status from the Literature. Effects are given as odds ratios (OR) and 95% confidence intervals (CI). Analysis limited to studies with data on both sprint/power and endurance athletes. Points and the horizontal lines represent the study effect sizes and their 95% CIs. Sizes of the squares represent the weights of the studies. Diamonds represent the summary effects and their 95% CIs. I-V: Inverse-variance, fixed effect model. D+L: DerSimonian & Laird, random effects model.

**Supp. Table S1. Summary of the Phenotypic Categorisations used in the Meta-analysis from the Published Literature on ACTN3 R577X Genotype and Athletic Status**

| Study                            | Population         | Sprint/Power Sport or Event                                                                                                                                                                                                                                                                   | Endurance Sport or Event                                                                                                                          | Source of Controls                 | X Allele Frequency in Controls |
|----------------------------------|--------------------|-----------------------------------------------------------------------------------------------------------------------------------------------------------------------------------------------------------------------------------------------------------------------------------------------|---------------------------------------------------------------------------------------------------------------------------------------------------|------------------------------------|--------------------------------|
| Yang <i>et al.</i> 2003          | Australian         | 30% competed at Olympic level: Track athletes (800m or less), swimmers (200m or less), judo athletes, short-distance track cyclists, and speed skaters.                                                                                                                                       | 9% competed at Olympic level: Long-distance cyclists, rowers, swimmers (400m or more), track athletes (5,000m or more), and cross-country skiers. | Blood donors, children and adults. | 0.44                           |
| Niemi & Majamaa 2005             | Finnish            | 34% competed at European or World Championship level: Sprinters (100 to 400m) and field athletes.                                                                                                                                                                                             | 50% competed at European or World Championship level: Runners (800m to marathon) and walkers.                                                     | Blood donors.                      | 0.32                           |
| Yang <i>et al.</i> 2007          | Ethiopian          |                                                                                                                                                                                                                                                                                               | Ethiopian athletics squad members (3000m to marathon).                                                                                            | Population.                        | 0.35                           |
|                                  | Kenyan             |                                                                                                                                                                                                                                                                                               | 24% competed at international level: Distance runners (3000m to marathon).                                                                        | Population.                        | 0.09                           |
|                                  | Nigerian           | 32% competed at international level: Track runners (400m or less) and jump athletes (110m hurdles, long and triple jumps).                                                                                                                                                                    |                                                                                                                                                   | Population.                        | 0.08                           |
| Paparini <i>et al.</i> 2007      | Italian            |                                                                                                                                                                                                                                                                                               | Rowers in pre-Olympic training.                                                                                                                   | Population.                        | 0.45                           |
| Papadimitriou <i>et al.</i> 2008 | Greek              | 60% competed at Olympic or European level: Track athletes (100 to 400m), jumpers, throwers and decathletes.                                                                                                                                                                                   | 50% competed at Olympic or European level: Track athletes (800m to marathon), triathletes and walkers.                                            | Population.                        | 0.46                           |
| Roth <i>et al.</i> 2008          | N American (White) | 24% ranked in world top 100: Body builders, power lifters and strength athletes.                                                                                                                                                                                                              |                                                                                                                                                   | Population.                        | 0.44                           |
|                                  | African-American   |                                                                                                                                                                                                                                                                                               |                                                                                                                                                   |                                    | 0.25                           |
| Druzhevskaya <i>et al.</i> 2008  | Russian            | 63% competed at international level (including Olympic): Alpine skiers, artistic gymnasts, body builders, figure skaters, ice hockey players, jumpers, power lifters, runners (100 to 400m), ski jumpers, soccer players, speed skaters, swimmers (50 to 100m), throwers, volleyball players, |                                                                                                                                                   | Population.                        | 0.39                           |



| Study                       | Population                              | Sprint/Power Sport or Event                                                        | Endurance Sport or Event                                                                                                                                                                                                                                                                       | Source of Controls    | X Allele Frequency in Controls |
|-----------------------------|-----------------------------------------|------------------------------------------------------------------------------------|------------------------------------------------------------------------------------------------------------------------------------------------------------------------------------------------------------------------------------------------------------------------------------------------|-----------------------|--------------------------------|
|                             |                                         | weight lifters and wrestlers.                                                      |                                                                                                                                                                                                                                                                                                |                       |                                |
| Ahmetov <i>et al.</i> 2008  | Russian                                 |                                                                                    | 51% competed at international level (including Olympic): biathletes (15 to 20km), cross-country skiers (10 to 50km), race walkers (10 to 50km), road cyclists (more than 50km), rowers (more than 2000m), swimmers (0.8 to 25km) and triathletes (swimming 1500m, cycling 40km, running 10km). | Population.           | 0.39                           |
| Santiago <i>et al.</i> 2008 | Spanish                                 | 22% competed at international level: Soccer players.                               | Cyclists (Tour de France finishers) and Olympic level runners (1500m to marathon).                                                                                                                                                                                                             | Sedentary adults.     | 0.45                           |
| Massidda <i>et al.</i> 2009 | Italian                                 | International and Olympic artistic gymnasts.                                       |                                                                                                                                                                                                                                                                                                | Sedentary.            | 0.43                           |
| Eynon <i>et al.</i> 2009    | Israeli                                 | 32% competed at international level (including Olympic): Sprinters (100 to 200m).  | 27% competed at international level (including Olympic): Runners (10km, marathon).                                                                                                                                                                                                             | Sedentary population. | 0.49                           |
| Doring <i>et al.</i> 2010   | N American (Caucasian), Finnish, German |                                                                                    | Competed at national or international level: Cross-country skiers, bi- and triathletes, cyclists, runners, and rowers.                                                                                                                                                                         | Sedentary.            | 0.43                           |
| Scott <i>et al.</i> 2010    | Jamaican                                | 74% competed at international level: Sprinters (up to 400m), jumpers and throwers. |                                                                                                                                                                                                                                                                                                | Population.           | 0.14                           |
|                             | African-American                        | 96% competed at international level: Sprinters (up to 400m), jumpers and throwers. |                                                                                                                                                                                                                                                                                                | Population.           | 0.19                           |

Sports and levels summarised from publications.

## References

- Ahmetov II, Druzhevskaya AM, Astratenkova IV, Popov DV, Vinogradova OL, Rogozkin VA. 2008. The ACTN3 R577X polymorphism in Russian endurance athletes. *Br J Sports Med* 44:649-652.
- Doring F, Onur S, Geisen U, Boulay M, Perusse L, Rankinen T, Rauramaa R, Wolfahrt B, Bouchard C. 2010. ACTN3 R577X and other polymorphisms are not associated with elite endurance athlete status in the Genathlete study. *J of Sports Sc* 28:1355-1359.

- Druzhevskaya AM, Ahmetov II, Astratenkova IV, Rogozkin VA. 2008. Association of the ACTN3 R577X polymorphism with power athlete status in Russians. *Eur J Appl Physiol* 103:631-634.
- Eynon N, Duarte JA, Oliveira J, Sagiv M, Yamin C, Meckel Y, Sagiv M, Goldhammer E. 2009. ACTN3 R577X polymorphism and Israeli top-level athletes. *Int J Sports Med* 30:695-698.
- Massidda M, Vona G, Calò CM. 2009. Association between the ACTN3 R577X polymorphism and artistic gymnastic performance in Italy. *Genet Test Mol Biomarkers* 13:377-380.
- Niemi A, Majamaa K. 2005. Mitochondrial DNA and ACTN3 genotypes in Finnish elite endurance and sprint athletes. *Eur J Hum Genet* 13:965-969.
- Papadimitriou ID, Papadopoulos C, Kouvatsi A, Triantaphyllidis C. 2008. The ACTN3 gene in elite Greek track and field athletes. *Int J Sports Med* 29:352-355.
- Paparini A, Ripani M, Giordano GD, Santoni D, Pigozzi F, Romano-Spica V. 2007. ACTN3 genotyping by real-time PCR in the Italian population and athletes. *Med Sci Sports Exerc* 39:810-815.
- Roth SM, Walsh S, Liu D, Metter EJ, Ferrucci L, Hurley BF. 2008. The ACTN3 R577X nonsense allele is under-represented in elite-level strength athletes. *Eur J Hum Genet* 16:391-394.
- Santiago C, González-Freire M, Serratos L, Morate FJ, Meyer T, Gómez-Gallego F, Lucia A. 2008. ACTN3 genotype in professional soccer players. *Br J Sports Med* 42:71-73.
- Scott RA, Irving R, Irwin L, Morrison E, Charlton V, Austin K, Tladi D, Deason M, Headley SA, Kolkhorst FW, Yang N, North K, Pitsiladis YP. 2010. ACTN3 and ACE Genotypes in Elite Jamaican and US Sprinters. *Med Sci Sports Exerc* 42:107-112.
- Yang N, MacArthur DG, Gulbin JP, Hahn AG, Beggs AH, Easteal S, North K. 2003. ACTN3 Genotype Is Associated with Human Elite Athletic Performance. *Am J Hum Genet* 73:627-631.
- Yang N, MacArthur DG, Wolde B, Onywera VO, Boit MK, Lau SYM, Wilson RH, Scott RA, Pitsiladis YP, North K. 2007. The ACTN3 R577X polymorphism in East and West African athletes. *Med Sci Sports Exerc* 39:1985-1988.

**Supp. Table S2. Summary of Sex, Age and ACTN3 R577X Genotype Frequencies by Cohort and Sex**

| Cohort   | Age* in years,<br>median (range) | Males       |             |             | Females     |             |             | Total<br>Individuals |
|----------|----------------------------------|-------------|-------------|-------------|-------------|-------------|-------------|----------------------|
|          |                                  | RR<br>n (%) | RX<br>n (%) | XX<br>n (%) | RR<br>n (%) | RX<br>n (%) | XX<br>n (%) |                      |
| ALSPAC   | 11 (10-13)                       | 487 (32.1)  | 722 (47.6)  | 308 (20.3)  | 467 (32.2)  | 706 (48.7)  | 277 (19.1)  | 2967                 |
| Eureka   | 15 (11-18)                       | 176 (33.5)  | 250 (47.6)  | 99 (18.9)   | 159 (34.0)  | 225 (48.2)  | 83 (17.8)   | 992                  |
| NSHD     | 53                               | 401 (31.1)  | 647 (50.2)  | 242 (18.8)  | 429 (32.9)  | 610 (46.7)  | 266 (20.4)  | 2595                 |
| ELSA     | 65 (52-90+)                      | 813 (32.8)  | 1208 (48.8) | 456 (18.4)  | 946 (32.0)  | 1415 (47.8) | 597 (20.2)  | 5435                 |
| HCS      | 66 (59-73)                       | 486 (32.6)  | 743 (49.8)  | 264 (17.7)  | 448 (33.5)  | 636 (47.5)  | 254 (19.0)  | 2831                 |
| HAS      | 67 (63-73)                       | 100 (32.4)  | 148 (47.9)  | 61 (19.7)   | 74 (37.2)   | 94 (47.2)   | 31 (15.6)   | 508                  |
| Boyd Orr | 70 (64-82)                       | 87 (27.4)   | 163 (51.4)  | 67 (21.1)   | 103 (28.1)  | 199 (54.2)  | 65 (17.7)   | 684                  |
| CaPS     | 73 (65-83)                       | 444 (33.9)  | 643 (49.1)  | 222 (17.0)  | -           | -           | -           | 1309                 |
| LBC1921  | 79 (77-80)                       | 65 (30.7)   | 98 (46.2)   | 49 (23.1)   | 93 (30.8)   | 152 (50.3)  | 57 (18.9)   | 514                  |
| Total    | 60 (10-90+)                      | 3059 (32.4) | 4622 (48.9) | 1768 (18.7) | 2719 (32.4) | 4037 (48.1) | 1630 (19.4) | 17835                |

\*Age at phase from which the majority of variables are taken, i.e. ALSPAC: Focus @11; Boyd Orr: III; CaPS: V; ELSA: II; HAS: I; HCS: I; LBC1921: I; NSHD: 1999 Collection. ALSPAC: Avon Longitudinal Study of Parents and Children; CaPS: Caerphilly Prospective Study; ELSA: English Longitudinal Study of Ageing; HAS: Hertfordshire Ageing Study; HCS: Hertfordshire Cohort Study; NSHD: National Survey of Health and Development.

**Supp. Table S3. Anthropometry by ACTN3 R577X Genotype and Sex**

| Variable                  | Cohort        | Males               |                     |                     |                        |               | Females             |                     |                     |                        |               |
|---------------------------|---------------|---------------------|---------------------|---------------------|------------------------|---------------|---------------------|---------------------|---------------------|------------------------|---------------|
|                           |               | RR<br>mean (sd) [n] | RX<br>mean (sd) [n] | XX<br>mean (sd) [n] | Total<br>mean (sd) [n] | p-value       | RR<br>mean (sd) [n] | RX<br>mean (sd) [n] | XX<br>mean (sd) [n] | Total<br>mean (sd) [n] | p-value       |
| Height,<br>cm             | ALSPAC        | 150.2 (7.0) [484]   | 150.2 (7.1) [714]   | 149.5 (6.6) [308]   | 150.1 (7.0) [1506]     | 0.16          | 151.1 (7.3) [462]   | 151.5 (7.2) [702]   | 151.5 (6.8) [276]   | 151.4 (7.2) [1440]     | 0.38          |
|                           | Eureka        | 167.3 (10.6) [176]  | 167.8 (11.4) [250]  | 167.6 (10.8) [99]   | 167.6 (11.0) [525]     | 0.79          | 160.2 (7.1) [159]   | 159.9 (6.5) [225]   | 161.6 (5.6) [83]    | 160.3 (6.6) [467]      | 0.23          |
|                           | NSHD          | 174.7 (6.4) [400]   | 174.6 (6.5) [647]   | 174.5 (6.7) [240]   | 174.6 (6.5) [1287]     | 0.69          | 162.1 (5.6) [429]   | 161.7 (5.9) [606]   | 161.6 (6.3) [265]   | 161.8 (5.9) [1300]     | 0.23          |
|                           | ELSA          | 172.5 (7.0) [783]   | 173.3 (6.9) [1178]  | 173.0 (6.5) [439]   | 173.0 (6.8) [2400]     | 0.11          | 159.1 (6.5) [924]   | 159.8 (6.6) [1355]  | 159.8 (6.8) [582]   | 159.6 (6.6) [2861]     | 0.0211        |
|                           | HCS           | 174.5 (6.4) [486]   | 174.0 (6.5) [741]   | 174.1 (6.5) [264]   | 174.2 (6.4) [1491]     | 0.23          | 160.7 (5.7) [448]   | 161.0 (6.0) [635]   | 160.9 (6.0) [254]   | 160.9 (5.9) [1337]     | 0.61          |
|                           | HAS           | 172.9 (6.0) [100]   | 171.3 (6.8) [148]   | 171.6 (6.3) [61]    | 171.9 (6.5) [309]      | 0.14          | 158.8 (5.6) [74]    | 158.8 (6.3) [94]    | 159.3 (6.1) [31]    | 158.9 (6.0) [199]      | 0.77          |
|                           | Boyd Orr      | 171.2 (7.0) [87]    | 171.5 (6.7) [163]   | 172.7 (6.1) [67]    | 171.7 (6.6) [317]      | 0.18          | 157.6 (7.7) [103]   | 158.7 (6.0) [199]   | 158.0 (4.9) [65]    | 158.3 (6.4) [367]      | 0.52          |
|                           | CaPS          | 170.0 (6.1) [267]   | 170.3 (6.4) [402]   | 169.8 (5.9) [123]   | 170.1 (6.2) [792]      | 0.96          | -                   | -                   | -                   | -                      | -             |
|                           | LBC1921       | 170.5 (7.3) [65]    | 172.2 (6.5) [98]    | 171.4 (7.0) [49]    | 171.5 (6.9) [212]      | 0.45          | 158.1 (5.4) [93]    | 157.1 (6.1) [152]   | 157.2 (5.4) [56]    | 157.4 (5.8) [301]      | 0.31          |
|                           | <b>Pooled</b> |                     | <b>[2848]</b>       | <b>[4341]</b>       | <b>[1650]</b>          | <b>[8839]</b> | <b>0.79</b>         | <b>[2692]</b>       | <b>[3968]</b>       | <b>[1612]</b>          | <b>[8272]</b> |
| Weight,<br>kg             | ALSPAC        | 43.3 (9.3) [455]    | 43.2 (9.3) [668]    | 41.9 (8.6) [283]    | 43.0 (9.2) [1406]      | 0.0498        | 43.8 (10.0) [466]   | 44.2 (9.8) [700]    | 44.8 (10.5) [277]   | 44.2 (10.0) [1443]     | 0.19          |
|                           | Eureka        | 62.6 (15.1) [176]   | 63.5 (16.7) [250]   | 62.2 (13.8) [99]    | 63.0 (15.6) [525]      | 0.93          | 55.7 (10.2) [158]   | 56.5 (9.9) [225]    | 56.9 (9.5) [83]     | 56.3 (9.9) [466]       | 0.36          |
|                           | NSHD          | 83.2 (12.4) [400]   | 83.5 (13.6) [646]   | 84.2 (13.3) [240]   | 83.5 (13.2) [1286]     | 0.38          | 72.1 (15.0) [425]   | 71.6 (13.9) [605]   | 70.2 (12.2) [264]   | 71.5 (14.0) [1294]     | 0.09          |
|                           | ELSA          | 82.7 (14.8) [789]   | 83.2 (13.1) [1178]  | 83.4 (14.2) [447]   | 83.1 (13.8) [2414]     | 0.35          | 70.9 (14.2) [917]   | 71.0 (14.4) [1364]  | 70.6 (13.8) [582]   | 70.9 (14.2) [2863]     | 0.79          |
|                           | HCS           | 83.1 (13.1) [486]   | 82.5 (12.8) [741]   | 81.7 (11.9) [264]   | 82.6 (12.7) [1491]     | 0.14          | 71.2 (13.1) [448]   | 71.3 (13.4) [636]   | 72.1 (14.3) [254]   | 71.4 (13.5) [1338]     | 0.45          |
|                           | HAS           | 80.1 (11.3) [100]   | 78.5 (13.3) [148]   | 78.6 (11.3) [61]    | 79.1 (12.3) [309]      | 0.39          | 67.8 (11.0) [74]    | 69.0 (12.7) [94]    | 68.0 (14.1) [31]    | 68.4 (12.3) [199]      | 0.80          |
|                           | Boyd Orr      | 79.9 (11.4) [86]    | 79.4 (13.0) [163]   | 81.1 (11.6) [67]    | 79.9 (12.3) [316]      | 0.58          | 68.2 (13.1) [103]   | 69.4 (13.2) [199]   | 70.9 (11.6) [65]    | 69.3 (12.9) [367]      | 0.19          |
|                           | CaPS          | 80.2 (12.9) [268]   | 80.8 (12.5) [405]   | 82.2 (14.1) [124]   | 80.8 (12.9) [797]      | 0.18          | -                   | -                   | -                   | -                      | -             |
|                           | LBC1921       | 76.0 (11.3) [65]    | 77.3 (10.4) [98]    | 79.0 (11.7) [49]    | 77.3 (11.0) [212]      | 0.16          | 63.8 (9.8) [93]     | 65.5 (11.7) [152]   | 63.8 (12.3) [57]    | 64.6 (11.3) [302]      | 0.80          |
|                           | <b>Pooled</b> |                     | <b>[2825]</b>       | <b>[4297]</b>       | <b>[1634]</b>          | <b>[8756]</b> | <b>0.94</b>         | <b>[2684]</b>       | <b>[3975]</b>       | <b>[1613]</b>          | <b>[8272]</b> |
| BMI,<br>kg/m <sup>2</sup> | ALSPAC        | 19.0 (3.1) [452]    | 18.9 (3.1) [661]    | 18.6 (2.9) [283]    | 18.9 (3.1) [1396]      | 0.06          | 19.0 (3.4) [461]    | 19.1 (3.3) [697]    | 19.3 (3.5) [276]    | 19.1 (3.4) [1434]      | 0.25          |
|                           | Eureka        | 22.1 (3.8) [176]    | 22.3 (4.2) [250]    | 22.0 (3.6) [99]     | 22.2 (3.9) [525]       | 0.86          | 21.6 (3.4) [158]    | 22.0 (3.3) [225]    | 21.7 (3.0) [83]     | 21.9 (3.3) [466]       | 0.64          |
|                           | NSHD          | 27.3 (3.9) [400]    | 27.3 (3.9) [646]    | 27.6 (4.0) [240]    | 27.4 (3.9) [1286]      | 0.28          | 27.4 (5.5) [425]    | 27.4 (5.4) [603]    | 27.0 (4.8) [263]    | 27.3 (5.3) [1291]      | 0.29          |
|                           | ELSA          | 27.7 (4.3) [775]    | 27.7 (3.9) [1162]   | 27.9 (4.2) [434]    | 27.7 (4.1) [2371]      | 0.60          | 28.0 (5.3) [906]    | 27.9 (5.3) [1336]   | 27.6 (4.9) [576]    | 27.9 (5.2) [2818]      | 0.15          |
|                           | HCS           | 27.3 (3.9) [486]    | 27.2 (3.8) [740]    | 27.0 (3.5) [264]    | 27.2 (3.8) [1490]      | 0.35          | 27.6 (4.9) [448]    | 27.5 (4.8) [635]    | 27.8 (5.2) [254]    | 27.6 (4.9) [1337]      | 0.57          |
|                           | HAS           | 26.8 (3.2) [100]    | 26.7 (3.7) [148]    | 26.8 (4.0) [61]     | 26.7 (3.6) [309]       | 0.96          | 26.9 (4.3) [74]     | 27.3 (4.6) [94]     | 26.7 (5.2) [31]     | 27.1 (4.6) [199]       | 0.93          |
|                           | Boyd Orr      | 27.2 (3.4) [86]     | 27.0 (4.0) [163]    | 27.2 (3.4) [67]     | 27.1 (3.7) [316]       | 0.91          | 27.5 (5.3) [103]    | 27.5 (4.9) [199]    | 28.4 (4.4) [65]     | 27.7 (4.9) [367]       | 0.32          |
|                           | CaPS          | 27.7 (4.0) [267]    | 27.8 (3.9) [402]    | 28.5 (4.9) [123]    | 27.9 (4.1) [792]       | 0.10          | -                   | -                   | -                   | -                      | -             |
|                           | LBC1921       | 26.1 (3.5) [65]     | 26.1 (3.5) [98]     | 26.9 (3.7) [49]     | 26.3 (3.5) [212]       | 0.29          | 25.5 (3.8) [93]     | 26.6 (4.6) [152]    | 25.9 (4.9) [56]     | 26.1 (4.5) [301]       | 0.40          |
|                           | <b>Pooled</b> |                     | <b>[2807]</b>       | <b>[4270]</b>       | <b>[1620]</b>          | <b>[8697]</b> | <b>0.87</b>         | <b>[2668]</b>       | <b>[3941]</b>       | <b>[1604]</b>          | <b>[8213]</b> |
| Waist-hip<br>ratio        | ALSPAC        | 0.85 (0.05) [440]   | 0.85 (0.05) [663]   | 0.84 (0.05) [290]   | 0.85 (0.05) [1393]     | 0.10          | 0.82 (0.05) [423]   | 0.82 (0.05) [645]   | 0.82 (0.05) [255]   | 0.82 (0.05) [1323]     | 0.65          |
|                           | NSHD          | 0.94 (0.06) [399]   | 0.93 (0.06) [647]   | 0.94 (0.07) [241]   | 0.94 (0.06) [1287]     | 0.83          | 0.80 (0.07) [427]   | 0.80 (0.06) [606]   | 0.81 (0.07) [265]   | 0.81 (0.07) [1298]     | 0.23          |
|                           | ELSA          | 0.95 (0.06) [797]   | 0.95 (0.06) [1178]  | 0.96 (0.06) [446]   | 0.95 (0.06) [2421]     | 0.15          | 0.84 (0.06) [923]   | 0.84 (0.07) [1371]  | 0.84 (0.07) [585]   | 0.84 (0.06) [2879]     | 0.40          |
|                           | HCS           | 0.97 (0.06) [486]   | 0.96 (0.06) [741]   | 0.96 (0.06) [263]   | 0.97 (0.06) [1490]     | 0.10          | 0.85 (0.07) [446]   | 0.85 (0.06) [633]   | 0.85 (0.06) [252]   | 0.85 (0.06) [1331]     | 0.32          |
|                           | HAS           | 0.94 (0.06) [100]   | 0.93 (0.05) [147]   | 0.93 (0.04) [61]    | 0.93 (0.05) [308]      | 0.23          | 0.80 (0.05) [74]    | 0.80 (0.05) [94]    | 0.79 (0.05) [31]    | 0.80 (0.05) [199]      | 0.40          |
|                           | Boyd Orr      | 0.98 (0.07) [50]    | 0.97 (0.06) [85]    | 0.97 (0.06) [43]    | 0.97 (0.07) [178]      | 0.67          | 0.86 (0.08) [56]    | 0.87 (0.08) [110]   | 0.86 (0.07) [40]    | 0.86 (0.08) [206]      | 0.90          |
|                           | CaPS          | 0.93 (0.06) [442]   | 0.93 (0.06) [639]   | 0.94 (0.07) [221]   | 0.93 (0.06) [1302]     | 0.08          | -                   | -                   | -                   | -                      | -             |
|                           | <b>Pooled</b> |                     | <b>[2714]</b>       | <b>[4100]</b>       | <b>[1565]</b>          | <b>[8379]</b> | <b>0.73</b>         | <b>[2349]</b>       | <b>[3459]</b>       | <b>[1428]</b>          | <b>[7236]</b> |

P-values per X allele. Pooled results based on z-scores. Waist-hip ratio in CaPS from Phase III.

**Supp. Table S4. Physical Activity by *ACTN3* R577X Genotype and Sex**

| Description                     | Cohort        | Males                    |                          |                          |                             |             | Females                  |                          |                          |                             |             |
|---------------------------------|---------------|--------------------------|--------------------------|--------------------------|-----------------------------|-------------|--------------------------|--------------------------|--------------------------|-----------------------------|-------------|
|                                 |               | RR<br>n (%) <sup>a</sup> | RX<br>n (%) <sup>a</sup> | XX<br>n (%) <sup>a</sup> | Total<br>n (%) <sup>a</sup> | p-value     | RR<br>n (%) <sup>a</sup> | RX<br>n (%) <sup>a</sup> | XX<br>n (%) <sup>a</sup> | Total<br>n (%) <sup>a</sup> | p-value     |
| At least 2hrs/week              | Eureka        | 132 (75.0)               | 191 (76.4)               | 73 (73.7)                | 396 (75.4)                  | 0.90        | 93 (58.5)                | 116 (51.6)               | 45 (54.2)                | 254 (54.4)                  | 0.38        |
| At least once/month             | NSHD          | 213 (53.1)               | 335 (51.9)               | 128 (53.1)               | 676 (52.5)                  | 0.93        | 198 (46.2)               | 320 (52.5)               | 132 (49.6)               | 650 (49.8)                  | 0.24        |
| Vigorous at least<br>once/month | ELSA          | 376 (46.2)               | 594 (49.2)               | 213 (46.7)               | 1183 (47.8)                 | 0.67        | 313 (33.1)               | 523 (37.0)               | 212 (35.5)               | 1048 (35.4)                 | 0.22        |
| At least once/month             | CaPS          | 133 (53.6)               | 203 (54.1)               | 63 (51.6)                | 399 (53.6)                  | 0.79        | -                        | -                        | -                        | -                           | -           |
| At least once/month             | LBC1921       | 44 (75.9)                | 49 (55.7)                | 23 (54.8)                | 116 (61.7)                  | 0.0225      | 38 (47.5)                | 45 (36.3)                | 29 (58.0)                | 112 (44.1)                  | 0.45        |
|                                 | <b>Pooled</b> | <b>[898/1696]</b>        | <b>[1372/2567]</b>       | <b>[500/960]</b>         | <b>[2770/5223]</b>          | <b>0.62</b> | <b>[642/1614]</b>        | <b>[1004/2374]</b>       | <b>[418/996]</b>         | <b>[2064/4984]</b>          | <b>0.15</b> |

a: #participants with event (%); Pooled: [#participants with event/total # participants with relevant data]. P-values per X allele.

**Supp. Table S5. Physical Capability by ACTN3 R577X Genotype and Sex**

| Variable                            | Cohort            | Males                    |                          |                          |                             |                   | Females                  |                          |                          |                             |             |
|-------------------------------------|-------------------|--------------------------|--------------------------|--------------------------|-----------------------------|-------------------|--------------------------|--------------------------|--------------------------|-----------------------------|-------------|
|                                     |                   | RR<br>mean (sd) [n]      | RX<br>mean (sd) [n]      | XX<br>mean (sd) [n]      | Total<br>mean (sd) [n]      | p-value           | RR<br>mean (sd) [n]      | RX<br>mean (sd) [n]      | XX<br>mean (sd) [n]      | Total<br>mean (sd) [n]      | p-value     |
| Grip strength,<br>kg                | ALSPAC            | 20.5 (4.1) [455]         | 20.8 (4.4) [687]         | 20.5 (4.1) [281]         | 20.7 (4.2) [1423]           | 0.81              | 19.6 (4.5) [446]         | 19.6 (4.2) [656]         | 19.8 (4.2) [262]         | 19.7 (4.3) [1364]           | 0.60        |
|                                     | Eureka            | 34.6 (10.3) [176]        | 34.4 (9.9) [250]         | 33.3 (9.1) [99]          | 34.3 (9.9) [525]            | 0.34              | 24.5 (5.0) [158]         | 24.6 (4.7) [225]         | 24.5 (4.7) [83]          | 24.5 (4.8) [466]            | 0.97        |
|                                     | NSHD              | 48.8 (11.8) [387]        | 47.4 (11.8) [625]        | 47.0 (13.4) [235]        | 47.8 (12.1) [1247]          | 0.05              | 28.2 (7.7) [413]         | 27.7 (8.1) [582]         | 27.5 (8.2) [256]         | 27.8 (8.0) [1251]           | 0.19        |
|                                     | ELSA              | 40.8 (10.0) [811]        | 41.3 (9.4) [1201]        | 40.7 (9.9) [452]         | 41.0 (9.7) [2464]           | 0.84              | 24.2 (6.7) [936]         | 24.6 (6.4) [1392]        | 24.6 (6.5) [593]         | 24.4 (6.5) [2921]           | 0.19        |
|                                     | HCS               | 44.5 (7.8) [486]         | 43.9 (7.1) [743]         | 43.9 (8.0) [263]         | 44.1 (7.5) [1492]           | 0.23              | 26.7 (5.7) [448]         | 26.6 (5.8) [636]         | 26.2 (5.7) [254]         | 26.6 (5.8) [1338]           | 0.32        |
|                                     | HAS               | 39.3 (6.6) [100]         | 37.7 (6.6) [148]         | 37.1 (7.8) [61]          | 38.1 (6.9) [309]            | 0.0361            | 22.9 (5.5) [73]          | 21.8 (5.3) [94]          | 21.8 (4.3) [31]          | 22.2 (5.2) [198]            | 0.22        |
|                                     | LBC1921           | 35.5 (6.7) [65]          | 33.9 (7.5) [98]          | 35.7 (8.2) [49]          | 34.8 (7.5) [212]            | 0.98              | 20.6 (3.9) [93]          | 20.6 (5.1) [152]         | 20.9 (4.0) [56]          | 20.7 (4.5) [301]            | 0.71        |
|                                     | <b>Pooled</b>     | <b>[2480]</b>            | <b>[3752]</b>            | <b>[1440]</b>            | <b>[7672]</b>               | <b>0.09</b>       | <b>[2567]</b>            | <b>[3737]</b>            | <b>[1535]</b>            | <b>[7839]</b>               | <b>0.90</b> |
| 2.44m walk,<br>s <sup>a</sup>       | ELSA              | 0.99 (0.34) [515]        | 0.97 (0.35) [777]        | 0.98 (0.34) [292]        | 0.98 (0.34) [1584]          | 0.38              | 1.07 (0.39) [619]        | 1.05 (0.37) [867]        | 1.05 (0.36) [379]        | 1.06 (0.37) [1865]          | 0.36        |
| 3m get up<br>and go, s <sup>a</sup> | HCS               | 2.35 (0.17) [331]        | 2.35 (0.17) [524]        | 2.34 (0.17) [181]        | 2.35 (0.17) [1036]          | 0.42              | 2.39 (0.21) [387]        | 2.38 (0.21) [528]        | 2.38 (0.18) [227]        | 2.38 (0.20) [1142]          | 0.37        |
| 3m get up<br>and go, s <sup>a</sup> | HAS               | 2.48 (0.24) [51]         | 2.46 (0.21) [55]         | 2.50 (0.32) [21]         | 2.47 (0.24) [127]           | 0.92              | 2.66 (0.33) [24]         | 2.54 (0.20) [37]         | 2.51 (0.45) [11]         | 2.57 (0.30) [72]            | 0.12        |
| 3m get up<br>and go, s <sup>a</sup> | Boyd Orr          | 2.24 (0.23) [50]         | 2.19 (0.23) [85]         | 2.25 (0.29) [43]         | 2.22 (0.25) [178]           | 0.91              | 2.25 (0.29) [56]         | 2.23 (0.28) [111]        | 2.25 (0.37) [40]         | 2.24 (0.30) [207]           | 0.98        |
| 3m get up<br>and go, s <sup>a</sup> | CaPS              | 2.33 (0.24) [256]        | 2.34 (0.26) [384]        | 2.31 (0.23) [112]        | 2.33 (0.25) [752]           | 0.87              | -                        | -                        | -                        | -                           | -           |
| 6m walk, s <sup>a</sup>             | LBC1921           | 1.40 (0.27) [65]         | 1.42 (0.35) [98]         | 1.43 (0.24) [49]         | 1.42 (0.30) [212]           | 0.57              | 1.49 (0.25) [93]         | 1.59 (0.31) [150]        | 1.51 (0.23) [55]         | 1.55 (0.28) [298]           | 0.37        |
| <b>Pooled</b>                       | <b>[1268]</b>     | <b>[1923]</b>            | <b>[698]</b>             | <b>[3889]</b>            | <b>0.39</b>                 | <b>[1179]</b>     | <b>[1693]</b>            | <b>[712]</b>             | <b>[3584]</b>            | <b>0.25</b>                 |             |
| Chair rises <sup>b</sup> -<br>10    | NSHD              | 5.39 (1.64) [377]        | 5.34 (1.90) [609]        | 5.29 (1.58) [220]        | 5.34 (1.76) [1206]          | 0.51              | 5.08 (1.61) [399]        | 5.13 (1.58) [566]        | 4.88 (1.60) [247]        | 5.06 (1.60) [1212]          | 0.20        |
| Chair rises <sup>b</sup> -<br>5     | ELSA              | 9.84 (3.19) [702]        | 9.83 (3.24) [1061]       | 9.92 (3.35) [392]        | 9.85 (3.24) [2155]          | 0.74              | 9.27 (2.99) [803]        | 9.44 (3.03) [1206]       | 9.65 (3.28) [519]        | 9.43 (3.07) [2528]          | 0.0268      |
| Chair rises <sup>b</sup> -<br>5     | HCS               | 6.62 (1.42) [199]        | 6.77 (1.41) [301]        | 6.84 (1.26) [111]        | 6.73 (1.39) [611]           | 0.15              | 5.84 (1.38) [291]        | 5.84 (1.47) [422]        | 6.05 (1.44) [173]        | 5.88 (1.44) [886]           | 0.18        |
| Chair rises <sup>b</sup> -<br>5     | HAS               | 5.55 (1.81) [47]         | 5.57 (1.47) [54]         | 5.64 (1.17) [19]         | 5.57 (1.56) [120]           | 0.86              | 4.70 (1.22) [22]         | 5.00 (1.44) [35]         | 5.79 (1.05) [10]         | 5.02 (1.35) [67]            | 0.0439      |
| <b>Pooled</b>                       | <b>[1325]</b>     | <b>[2025]</b>            | <b>[742]</b>             | <b>[4092]</b>            | <b>0.63</b>                 | <b>[1515]</b>     | <b>[2229]</b>            | <b>[949]</b>             | <b>[4693]</b>            | <b>0.32<sup>c</sup></b>     |             |
| Standing<br>balance<br>description  | Cohort            | RR<br>n (%) <sup>d</sup> | RX<br>n (%) <sup>d</sup> | XX<br>n (%) <sup>d</sup> | Total<br>n (%) <sup>d</sup> | p-value           | RR<br>n (%) <sup>d</sup> | RX<br>n (%) <sup>d</sup> | XX<br>n (%) <sup>d</sup> | Total<br>n (%) <sup>d</sup> | p-value     |
| One-legged-<br><30s                 | NSHD              | 96 (24.7)                | 140 (22.3)               | 51 (21.6)                | 287 (22.9)                  | 0.33              | 135 (32.4)               | 184 (31.1)               | 89 (34.5)                | 408 (32.2)                  | 0.66        |
| Tandem- <5s                         | ELSA              | 89 (10.9)                | 122 (10.1)               | 43 (9.4)                 | 254 (10.3)                  | 0.38              | 150 (15.9)               | 227 (16.0)               | 76 (12.7)                | 453 (15.3)                  | 0.14        |
| Flamingo-<br><30s                   | HCS               | 95 (47.0)                | 169 (54.3)               | 65 (56.0)                | 329 (52.3)                  | 0.09              | 200 (65.8)               | 297 (67.7)               | 118 (66.7)               | 615 (66.8)                  | 0.78        |
| Flamingo-<br><30s                   | Boyd Orr          | 39 (78.0)                | 56 (65.9)                | 31 (73.8)                | 126 (71.2)                  | 0.60              | 46 (82.1)                | 93 (83.8)                | 26 (65.0)                | 165 (79.7)                  | 0.07        |
| Flamingo-<br><30s                   | CaPS              | 181 (71.3)               | 281 (72.4)               | 80 (67.8)                | 542 (71.3)                  | 0.63              | -                        | -                        | -                        | -                           | -           |
| <b>Pooled</b>                       | <b>[500/1707]</b> | <b>[768/2620]</b>        | <b>[270/968]</b>         | <b>[1538/5295]</b>       | <b>0.64</b>                 | <b>[531/1723]</b> | <b>[801/2557]</b>        | <b>[309/1072]</b>        | <b>[1641/5352]</b>       | <b>0.47</b>                 |             |

a: time taken on logarithmic scale. b: Reciprocal of time taken in sec x 100. c: significant heterogeneity, p-value=0.0241. d: #participants with event (%); Pooled: [#participants with event/total # participants with relevant data]. P-values per X allele. Pooled results based on z-scores. Timed get up and go, chair rises in HAS from Phase II; balance, timed get up and go, chair rises in HCS from both phases.
